# Supplementary material for: Guaranteed detection of the singularities of 3R robotic manipulators
Source: Copernicus journal article supplement (doi:10.5194/ms-7-31-2016), 2016-01-21
Supplement: Supplementary file 1 [file ms-7-31-2016-supplement.zip]

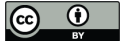

## *Supplement of*

# **Guaranteed detection of the singularities of 3R robotic manipulators**

**R. Benoit et al.**

*Correspondence to:* R. Benoit ([romain.benoit@etud.univ-angers.fr](mailto:romain.benoit@etud.univ-angers.fr))

- ms-7-31-2016-supplement-title-page.pdf
- trajectoires
  - Trajectoire\_non\_singuliere\_25fps.avi
  - Trajectoire\_singuliere\_25fps.avi

The copyright of individual parts of the supplement might differ from the CC-BY 3.0 licence.
